# Supplementary material for: Association of Urine Metanephrine Levels with CardiometaBolic Risk: An Observational Retrospective Study
Source: MDPI journal article supplement (doi:10.3390/jcm10091967), 2021-05-04
Supplement: s1 [file s1]

| Covariates                    | Hypertensive cardiomyopathy |           |         |      |           |         |
|-------------------------------|-----------------------------|-----------|---------|------|-----------|---------|
|                               | OR                          | 95% CI    | p-value | OR   | 95% CI    | p-value |
| Gender                        | 1.17                        | 0.79-1.74 | 0.430   | 1.23 | 0.83-1.83 | 0.296   |
| Age                           | 1.02                        | 1.00-1.03 | 0.029   | 1.02 | 1.00-1.03 | 0.022   |
| Smoking habit                 | 2.00                        | 1.36-2.95 | <0.001  | 2.02 | 1.37-2.98 | <0.001  |
| FH of CVD                     | 1.17                        | 0.65-2.02 | 0.587   | 1.12 | 0.62-1.93 | 0.701   |
| BMI                           | 1.04                        | 1.01-1.08 | 0.016   | 1.05 | 1.01-1.08 | 0.010   |
| SBP                           | 1.01                        | 0.99-1.02 | 0.222   | 1.01 | 1.00-1.02 | 0.154   |
| DBP                           | 1.01                        | 0.99-1.04 | 0.192   | 1.01 | 0.99-1.04 | 0.202   |
| DM                            | 1.65                        | 0.94-2.82 | 0.074   | 1.66 | 0.95-2.84 | 0.068   |
| No. of antihypertensive drugs | 1.40                        | 1.06-1.84 | 0.015   | 1.41 | 1.07-1.85 | 0.013   |
| ACEi/ARB                      | 1.22                        | 0.73-2.08 | 0.449   | 1.21 | 0.72-2.04 | 0.483   |
| <i>Normetanephrine</i>        | 1.09                        | 1.00-1.18 | 0.035   | -    | -         | -       |
| <i>Metanephrine</i>           | -                           | -         | -       | 1.07 | 0.85-1.33 | 0.581   |

**Table S1. Logistic regression analysis on the association of metanephrines and covariates with presence of hypertensive cardiomyopathy, after excluding patients taking drugs acting on the sympathetic system (ORs of normetanephrine and metanephrine are calculated for a unit of increase of 100 µg/die).** Abbreviations: ACEi/ARB, angiotensin converting enzyme inhibitors or angiotensin II receptor blockers; BMI, body mass index; CI, confidence interval; CVD, cardiovascular disease; DBP, diastolic blood pressure; DM, diabetes mellitus; FH, family history; OR, odds ratio; SBP, systolic blood pressure.

| Covariates                    | Metabolic syndrome |           |         |      |           |         |
|-------------------------------|--------------------|-----------|---------|------|-----------|---------|
|                               | OR                 | 95% CI    | p-value | OR   | 95% CI    | p-value |
| Gender                        | 1.02               | 0.65-1.59 | 0.939   | 1.13 | 0.72-1.76 | 0.578   |
| Age                           | 0.99               | 0.98-1.01 | 0.445   | 1.00 | 0.98-1.01 | 0.571   |
| Smoking habit                 | 1.26               | 0.82-1.94 | 0.293   | 1.30 | 0.85-2.00 | 0.233   |
| FH of CVD                     | 1.32               | 0.71-2.34 | 0.363   | 1.24 | 0.67-2.20 | 0.469   |
| No. of antihypertensive drugs | 1.33               | 1.07-1.66 | 0.010   | 1.35 | 1.09-1.68 | 0.006   |
| eGFR                          | 1.00               | 0.99-1.01 | 0.495   | 1.00 | 0.99-1.01 | 0.421   |
| <i>Normetanephrine</i>        | 1.12               | 1.01-1.23 | 0.026   | -    | -         | -       |
| <i>Metanephrine</i>           | -                  | -         | -       | 0.95 | 0.71-1.22 | 0.688   |

**Table S2. Logistic regression analysis on the association of metanephrines and covariates with presence of metabolic syndrome, after excluding patients taking drugs acting on the sympathetic system (ORs of normetanephrine and metanephrine are calculated for a unit of increase of 100 µg/die). Abbreviations: CI, confidence interval; CVD, cardiovascular disease; eGFR, estimated glomerular filtration rate; FH, family history; OR, odds ratio.**

| Covariates                    | Microalbuminuria |           |         |      |           |         |
|-------------------------------|------------------|-----------|---------|------|-----------|---------|
|                               | OR               | 95% CI    | p-value | OR   | 95% CI    | p-value |
| Gender                        | 1.71             | 0.93-3.14 | 0.084   | 1.56 | 0.85-2.89 | 0.152   |
| Age                           | 1.00             | 0.98-1.03 | 0.693   | 1.00 | 0.98-1.03 | 0.710   |
| Smoking habit                 | 1.04             | 0.56-1.88 | 0.907   | 1.00 | 0.54-1.82 | 0.998   |
| FH of CVD                     | 1.24             | 0.45-2.86 | 0.647   | 1.30 | 0.48-3.01 | 0.573   |
| BMI                           | 0.97             | 0.91-1.03 | 0.399   | 0.97 | 0.91-1.03 | 0.423   |
| SBP                           | 0.99             | 0.97-1.02 | 0.674   | 0.99 | 0.97-1.02 | 0.599   |
| DBP                           | 1.01             | 0.98-1.05 | 0.628   | 1.01 | 0.98-1.05 | 0.635   |
| DM                            | 1.74             | 0.67-4.00 | 0.216   | 1.77 | 0.68-4.06 | 0.207   |
| No. of antihypertensive drugs | 0.68             | 0.39-1.13 | 0.158   | 0.68 | 0.38-1.12 | 0.153   |
| ACEi/ARB                      | 2.00             | 0.81-5.04 | 0.135   | 2.01 | 0.81-5.12 | 0.139   |
| <i>Normetanephine</i>         | 0.97             | 0.82-1.11 | 0.714   | -    | -         | -       |
| <i>Metanephine</i>            | -                | -         | -       | 1.21 | 0.86-1.63 | 0.224   |

**Table S3. Logistic regression analysis on the association of covariates with presence of microalbuminuria, after excluding patients taking drugs acting on the sympathetic system (ORs of metanephine are calculated for a unit of increase of 100 µg/die).**

Abbreviations: ACEi/ARB, angiotensin converting enzyme inhibitors or angiotensin II receptor blockers; BMI, body mass index; CI, confidence interval; CVD, cardiovascular disease; DBP, diastolic blood pressure; DM, diabetes mellitus; FH, family history; OR, odds ratio; SBP, systolic blood pressure.

| Covariates                    | eGFR<60 mL/min/1.73 m <sup>2</sup> |           |         |      |           |         |
|-------------------------------|------------------------------------|-----------|---------|------|-----------|---------|
|                               | OR                                 | 95% CI    | P-value | OR   | 95% CI    | p-value |
| Gender                        | 0.76                               | 0.43-1.31 | 0.328   | 0.86 | 0.48-1.49 | 0.588   |
| Age                           | 1.05                               | 1.03-1.07 | <0.001  | 1.05 | 1.03-1.07 | <0.001  |
| Smoking habit                 | 0.85                               | 0.50-1.45 | 0.563   | 0.90 | 0.52-1.53 | 0.694   |
| FH of CVD                     | 1.41                               | 0.64-2.87 | 0.369   | 1.33 | 0.60-2.71 | 0.450   |
| BMI                           | 0.97                               | 0.91-1.02 | 0.255   | 0.96 | 0.91-1.02 | 0.208   |
| SBP                           | 1.02                               | 1.00-1.04 | 0.027   | 1.02 | 1.00-1.04 | 0.017   |
| DBP                           | 0.99                               | 0.96-1.01 | 0.290   | 0.98 | 0.96-1.01 | 0.247   |
| DM                            | 1.56                               | 0.74-3.12 | 0.223   | 1.50 | 0.70-3.00 | 0.274   |
| No. of antihypertensive drugs | 1.34                               | 1.02-1.75 | 0.032   | 1.36 | 1.04-1.78 | 0.026   |
| <i>Normetanephrine</i>        | 1.02                               | 0.90-1.14 | 0.696   | -    | -         | -       |
| <i>Metanephrine</i>           | -                                  | -         | -       | 0.73 | 0.47-1.05 | 0.120   |

**Table S4. Logistic regression analysis on the association of metanephrines and covariates with presence of eGFR<60 mL/min/1.73 m<sup>2</sup>, after excluding patients taking drugs acting on the sympathetic system (ORs of normetanephrine and metanephrine are calculated for a unit of increase of 100 µg/die). Abbreviations: BMI, body mass index; CI, confidence interval; CVD, cardiovascular disease; DBP, diastolic blood pressure; DM, diabetes mellitus; eGFR, estimated glomerular filtration rate; FH, family history; OR, odds ratio; SBP, systolic blood pressure.**
